# Supplementary material for: Improvement of quasi-solid-state supercapacitors based on a “water-in-salt” hydrogel electrolyte by introducing redox-active ionic liquid and carbon nanotubes
Source: Royal Society of Chemistry journal article supplement (doi:10.1039/d2nj00796g), 2022-01-01
Supplement: d2nj00796g1.pdf [file d2nj00796g1.pdf]

## **Supporting Information**

### **Improvement of Quasi-Solid-State Supercapacitors Based on “Water-in-Salt” Hydrogel Electrolyte by Introducing Redox- Active Ionic Liquid and Carbon Nanotubes**

Le-Qing Fan,<sup>\*ab</sup> Cheng-Long Geng,<sup>ab</sup> Xu-Geng Deng,<sup>ab</sup> Jiao-Juan Chen,<sup>ab</sup> Zheng-Xue  
Wu,<sup>ab</sup> Yun-Fang Huang<sup>b</sup> and Ji-Huai Wu<sup>\*ab</sup>

<sup>a</sup> Fujian Key Laboratory of Photoelectric Functional Materials, College of Materials  
Science and Engineering, Huaqiao University, Xiamen, Fujian 361021, China

<sup>b</sup> Engineering Research Center of Environment-Friendly Functional Materials, Ministry  
of Education, Huaqiao University, Xiamen, Fujian 361021, China

\*E-mail addresses: leqingfan@163.com (L.-Q. Fan), jhwu@hqu.edu.cn (J.-H. Wu).

## Materials

The following analytical chemicals were purchased to carry out directly experiments without further purification. Polyvinyl alcohol (PVA, average molecular weight 88000, Aladdin Reagent, Shanghai, China), lithium bis(trifluoromethylsulphonyl)imide (LiTFSI, Energy Chemical, Shanghai, China), 1-butyl-3-methylimidazolium iodide (BMIMI, Aladdin Reagent, Shanghai, China) were used to prepare HEs. Activated carbon (AC) with specific surface area of  $2167 \text{ m}^2 \text{ g}^{-1}$  (Yi Huan Co. Ltd, Fuzhou, China), carbon black (Alfa Aesar) and polytetrafluoroethylene dispersion (60 wt.%, Xingshengjie Co. Ltd, Guangzhou, China) are used to prepare AC electrodes.

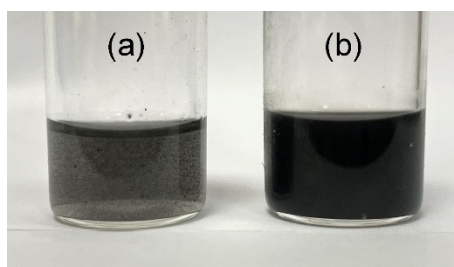

**Fig. S1** Photos of (a) PVA/LiTFSI/CNTs and (b) PVA/LiTFSI/BMIMI/CNTs HEs.

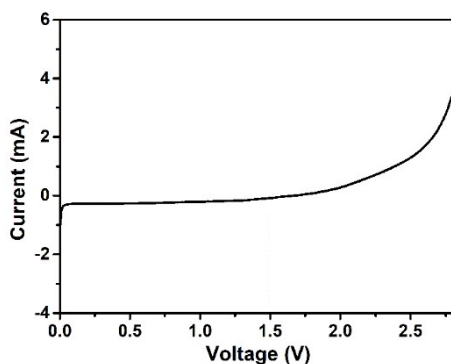

**Fig. S2** Linear sweep voltammetry profile of the QSC of with a PVA/LiTFSI HE.
